# Supplementary material for: C-reactive protein and lactate dehydrogenase as prognostic indicators in COVID-2019 outpatients
Source: bioRxiv or medRxiv preprint supplement (doi:10.1101/2021.11.17.21265553), 2022-01-11
Supplement: Supplementary file [file media-1.pdf]

**S1 Table. Characteristics of 282 outpatients who visited our hospital during the study period**

|                                                   | No oxygen therapy<br>(n = 238) | Oxygen therapy (n<br>= 44) | P       |
|---------------------------------------------------|--------------------------------|----------------------------|---------|
| Male (%)                                          | 124 (52.1%)                    | 25 (56.8%)                 | 0.680   |
| Age (years), median (IQR)                         | 38.0 (24.0–48.0)               | 55.0 (45.5–73.0)           | <0.001* |
| Body mass index, median (IQR)<br>(missing: 28.7%) | 23.8 (20.1–26.2)               | 25.7 (22.6–27.6)           | 0.045*  |
| Smoking, yes (%) (missing: 33.7%)                 | 75 (36.2%)                     | 21 (47%)                   | 0.340   |
| SARS-CoV-2 vaccines, yes (%)                      | 6 (2.5%)                       | 3 (6.8%)                   | 0.151   |
| Comorbidities (%)                                 | 68 (28.6%)                     | 23 (52.3%)                 | <0.001* |

IQR, interquartile range; SARS-CoV-2, severe acute respiratory syndrome coronavirus 2
