# Supplementary material for: C-reactive protein and lactate dehydrogenase as prognostic indicators in COVID-2019 outpatients
Source: bioRxiv or medRxiv preprint supplement (doi:10.1101/2021.11.17.21265553), 2022-01-11
Supplement: Supplementary file [file media-2.pdf]

**S2 Table. Comorbidities of 142 patients who underwent blood testing**

|                                               | No oxygen therapy<br>(n = 102) | Oxygen therapy<br>(n = 40) | P      |
|-----------------------------------------------|--------------------------------|----------------------------|--------|
| Comorbidities (%)                             | 40 (39.2%)                     | 21 (52.5%)                 | 0.211  |
| COPD (%)                                      | 0 (0%)                         | 3 (7.5%)                   | 0.021* |
| Asthma (%)                                    | 7 (6.9%)                       | 4 (10%)                    | 0.504  |
| Lung disease excluding COPD and<br>asthma (%) | 5 (4.9%)                       | 3 (7.5%)                   | 0.687  |
| Malignancy (%)                                | 2 (2.0%)                       | 3 (7.5%)                   | 0.136  |
| Hypertension (%)                              | 14 (13.7%)                     | 6 (15%)                    | 1      |
| Heart disease excluding<br>hypertension (%)   | 5 (4.9%)                       | 2 (5%)                     | 1      |
| Renal failure (%)                             | 1 (1.0%)                       | 0 (0%)                     | 1      |
| Diabetes (%)                                  | 14 (13.7%)                     | 7 (17.5%)                  | 0.759  |
| Immunosuppressive disease (%)                 | 2(2.0%)                        | 0 (0%)                     | 1      |

COPD, chronic obstructive pulmonary disease
